# Supplementary material for: POPDC1 scaffolds a complex of adenylyl cyclase 9 and the potassium channel TREK‐1 in heart
Source: PubMed Central journal article supplement (PMC9724675; doi:10.15252/embr.202255208), 2022-10-18
Supplement: EMBR-23-e55208-s006.pdf [file EMBR-23-e55208-s006.pdf]

## Expanded View Figures

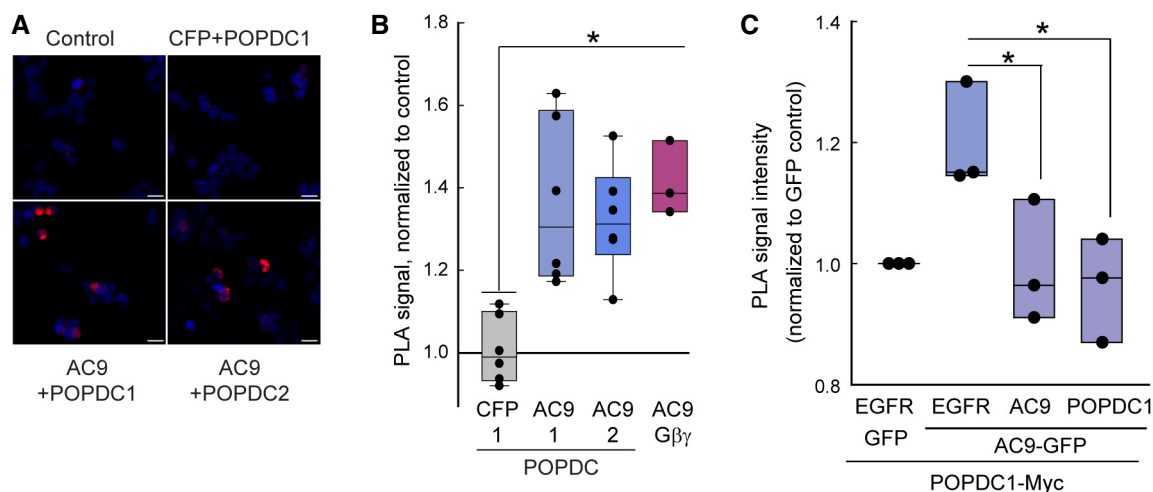

**Figure EV1. PLA signal between GFP-tagged AC9 and POPDC1-Myc.**

- A, B Images (A) of PLA signal (red) and DAPI (blue) performed in HEK293 cells using antibodies against GFP and MYC tags. Scale bars are 20  $\mu\text{m}$ . Mean cellular fluorescence intensity of PLA signal (B) was quantified by high content microscopy. The Kruskal–Wallis one-way ANOVA analysis was performed ( $n = 7$  experiments,  $P = 0.003$  between groups) with multiple comparisons by the Bonferroni  $t$ -test ( $*P < 0.05$ ). Boxplots show the median as the central band, the box size as the lower and upper quartiles, while the 10<sup>th</sup> and 90<sup>th</sup> percentiles are represented by the whiskers.
- C Competition of PLA signal between GFP-tagged AC9 and POPDC1-Myc with overexpression of nontagged EGFR (control), Flag-AC9, or POPDC1-Flag in HEK293 cells. Mean cellular fluorescence intensity was quantified by high content microscopy and normalized to GFP control. The Kruskal–Wallis one-way ANOVA analysis was performed ( $n = 3$  experiments, >1,000 cells per experiment) with multiple comparisons by the Student–Newman–Keuls method ( $*P < 0.05$ ). Boxplots show the median as the central band, the box size as the lower and upper quartiles, while the whiskers are the range.
