# Supplementary material for: POPDC1 scaffolds a complex of adenylyl cyclase 9 and the potassium channel TREK‐1 in heart
Source: PubMed Central journal article supplement (PMC9724675; doi:10.15252/embr.202255208), 2022-10-18
Supplement: EMBR-23-e55208-s009.pdf [file EMBR-23-e55208-s009.pdf]

# **Popeye Domain-Containing Protein 1 Scaffolds a Complex of Adenylyl Cyclase 9 and the Two-Pore-Domain Potassium Channel TREK-1 in Heart**

Tanya A. Baldwin<sup>1†</sup>, Yong Li<sup>1†</sup>, Autumn Marsden<sup>1</sup>, Susanne Rinné<sup>4</sup>, Anibal Garza Carbajal<sup>1</sup>, Roland F.R. Schindler<sup>3</sup>, Musi Zhang<sup>1</sup>, Mia A. Garcia<sup>1</sup>, Venugopal Reddy Venna<sup>2</sup>, Niels Decher<sup>4</sup>, Thomas Brand<sup>3</sup>, and Carmen W. Dessauer<sup>1\*</sup>

<sup>1</sup>Dept. Integrative Biology and Pharmacology, McGovern Medical School, University of Texas Health Science Center, Houston, TX 77030

<sup>2</sup>Dept. Neurology, McGovern Medical School, University of Texas Health Science Center, Houston, TX 77030

<sup>3</sup>National Heart and Lung Institute, Imperial College London, London, United Kingdom

<sup>4</sup>Institute for Physiology and Pathophysiology, Vegetative Physiology and Marburg Center for Mind, Brain and Behavior MCMBB, Philipps-University of Marburg, Marburg, Germany

†These authors contributed equally to this work.

\*Corresponding author. Tel: +1 713-500-6308. [Carmen.W.Dessauer@uth.tmc.edu](mailto:Carmen.W.Dessauer@uth.tmc.edu)

## **Appendix Table of Context**

### **Appendix Table S1:**

Appendix Table 1. Expression of POPDC1 and POPDC2 RNA in HEK293 cells is 10-fold greater than in COS-7 cells. ....Page 2

### **Appendix Figures:**

Appendix Figure S1. Immunoprecipitation of TREK-1 pulls down POPDC1 and AC9. ....Page 2

Appendix Figure S2. Validation of anti-TREK-1 antibody for immunoprecipitation. ....Page 3

Appendix Figure S3. Western blot examples of HEK293 lysates expressing BiFC constructs with and without ISO stimulation. ....Page 3

**Appendix Table S1. Expression of POPDC1 and POPDC2 RNA in HEK293 cells is 10-fold greater than in COS-7 cells.**

RT-PCR of POPDC isoforms for HEK393 versus COS-7 cells and normalized using either GAPDH or 18S rRNA.

|        | Fold change* (GAPDH) | Fold change* (18S rRNA) |
|--------|----------------------|-------------------------|
| POPDC1 | 14.4                 | 15.9                    |
| POPDC2 | 9.4                  | 13.1                    |

\*( $2^{\Delta\Delta CT}$ , HEK293 vs COS-7)

Primer sequences (conserved in human and African green monkey):

POPDC1, Forward: 5'- ATGAAGGTCTCCTATCGAGGAC-3'

POPDC1, Reverse: 5'-CTGCAGTTATCATCTGCAATAATG-3'

POPDC2, Forward: 5'- GCAGTTTCTGCACTACATCTTTC-3'

POPDC2, Reverse: 5'-GATGTATCGCTCTTTGGTCAGAA-3'

**Appendix Figures**

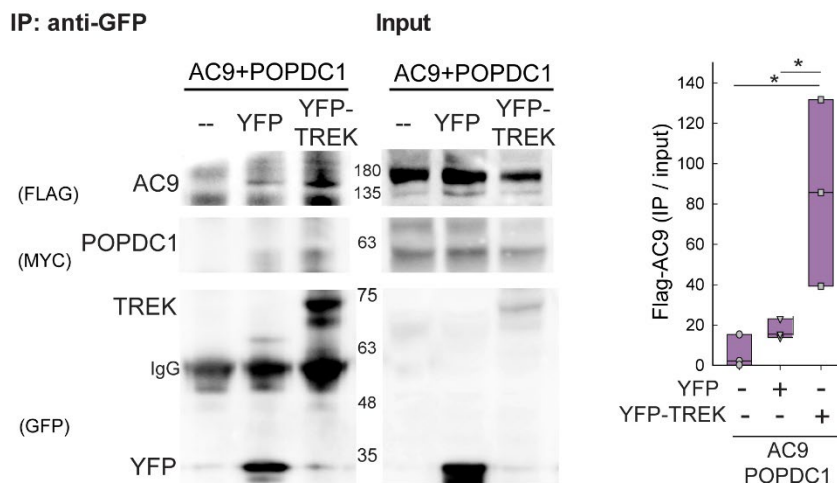

**Appendix Figure S1. Immunoprecipitation of TREK-1 pulls down POPDC1 and AC9.**

Performed as indicated in Fig 4D, comparing YFP expression alone versus YFP-tagged TREK-1. Quantification (IP/input) of Flag-AC9 pulldown for the different samples is shown on the right. Kruskal-Wallis One Way ANOVA analysis of Variance on Ranks was performed (n=3 experiments; P=0.01 overall) with multiple comparisons by Student-Newman-Keuls Method (\*P<0.05). Boxplots show the median as the central band, the box size as the lower and upper quartiles, while the 10<sup>th</sup> and 90<sup>th</sup> percentiles are represented by the whiskers.

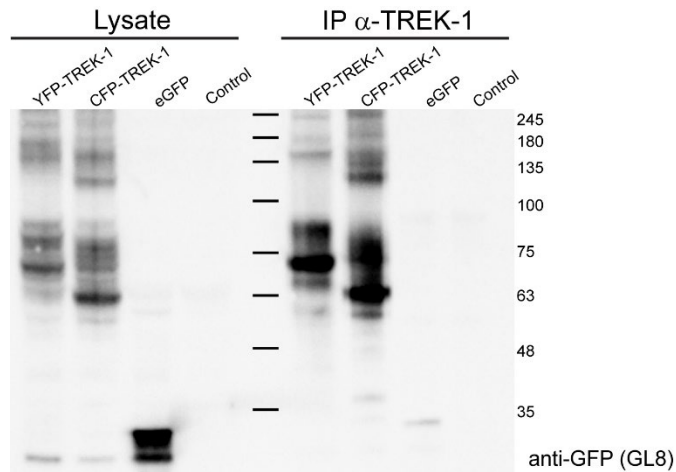

**Appendix Fig 2. Validation of anti-TREK-1 antibody for immunoprecipitation.** GFP, YFP-tagged TREK-1, and CFP-tagged TREK-1 were expressed in HEK293 cells and immunoprecipitated with TREK-1 antibody. Cell lysates and immunoprecipitates were then subjected to western blotting with anti-GFP. Anti-TREK-1 pulled down tagged TREK-1 proteins but not GFP controls.

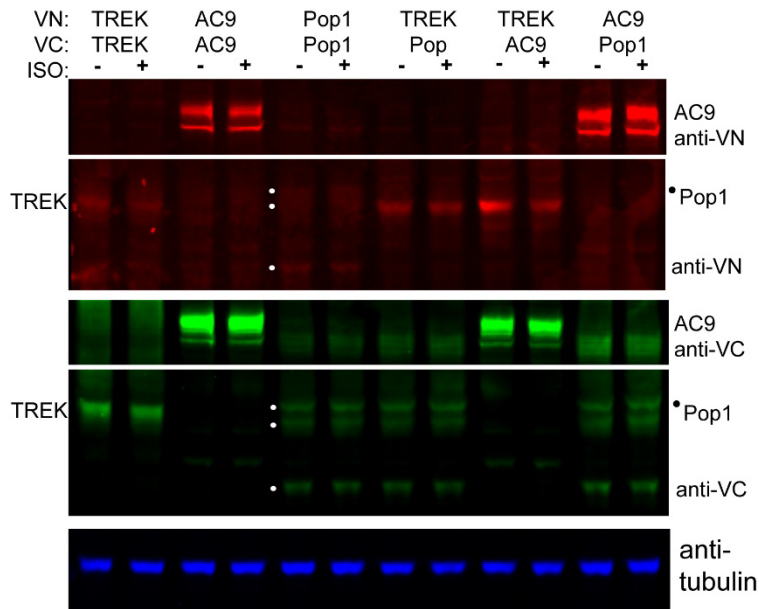

**Appendix Fig 3. Western blot examples of HEK293 lysates expressing BiFC constructs with and without ISO stimulation.** As shown in Fig 5B, indicated constructs were expressed in HEK293 cells and treated with isoproterenol. Cell lysates were subjected to western blotting using anti-VN (Gfp (D5.1) XP® Rabbit mAb) or anti-VC (JL-8 mouse monoclonal) antibodies against GFP.
